# Supplementary material for: Differential Antigen Expression Profile Predicts Immunoreactive Subset of Advanced Ovarian Cancers
Source: PubMed Central journal article supplement (PMC4224408; doi:10.1371/journal.pone.0111586), 2014-11-07
Supplement: pone.0111586.s001.pdf [file pone.0111586.s001.pdf]

**Table S1.** Univariate associations between genes and overall survival measured by score test p-value.

| Gene Symbol     | Entrez ID | Gene Description                                                          | Discovery p-value | Validation p-value |
|-----------------|-----------|---------------------------------------------------------------------------|-------------------|--------------------|
| <i>B2M</i>      | 567       | beta-2-microglobulin                                                      | 7.18e-01          | 6.36e-02           |
| <i>CALR</i>     | 811       | calreticulin                                                              | 1.68e-02          | 2.69e-01           |
| <i>CANX</i>     | 821       | calnexin                                                                  | 6.88e-01          | 6.79e-01           |
| <i>CD4</i>      | 920       | CD4 molecule                                                              | 1.55e-01          | 7.28e-02           |
| <i>CD74</i>     | 972       | CD74 molecule, major histocompatibility complex, class II invariant chain | 7.82e-01          | 2.01e-03           |
| <i>CD8A</i>     | 925       | CD8a molecule                                                             | 2.28e-01          | 2.25e-01           |
| <i>CD8B</i>     | 926       | CD8b molecule                                                             | 4.37e-01          | 2.45e-02           |
| <i>CIITA</i>    | 4261      | class II, major histocompatibility complex, transactivator                | 3.56e-01          | 1.88e-03           |
| <i>CREB1</i>    | 1385      | cAMP responsive element binding protein 1                                 | 5.17e-01          | 2.44e-01           |
| <i>CTSB</i>     | 1508      | cathepsin B                                                               | 8.31e-01          | 4.11e-02           |
| <i>CTSS</i>     | 1520      | cathepsin S                                                               | 3.91e-01          | 8.78e-04           |
| <i>HLA-A</i>    | 3105      | major histocompatibility complex, class I, A                              | 1.71e-01          | 1.54e-02           |
| <i>HLA-B</i>    | 3106      | major histocompatibility complex, class I, B                              | 3.84e-01          | 3.43e-02           |
| <i>HLA-C</i>    | 3107      | major histocompatibility complex, class I, C                              | 1.40e-01          | 1.77e-02           |
| <i>HLA-DMA</i>  | 3108      | major histocompatibility complex, class II, DM alpha                      | 2.38e-01          | 9.21e-04           |
| <i>HLA-DMB</i>  | 3109      | major histocompatibility complex, class II, DM beta                       | 5.54e-02          | 1.73e-02           |
| <i>HLA-DOA</i>  | 3111      | major histocompatibility complex, class II, DO alpha                      | 2.16e-02          | 8.27e-01           |
| <i>HLA-DOB</i>  | 3112      | major histocompatibility complex, class II, DO beta                       | 2.09e-05          | 2.17e-02           |
| <i>HLA-DPA1</i> | 3113      | major histocompatibility complex, class II, DP alpha 1                    | 7.09e-01          | 3.11e-03           |
| <i>HLA-DPB1</i> | 3115      | major histocompatibility complex, class II, DP beta 1                     | 4.50e-01          | 1.67e-02           |
| <i>HLA-DQA1</i> | 3117      | major histocompatibility complex, class II, DQ alpha 1                    | 2.32e-01          | 1.45e-01           |
| <i>HLA-DQB1</i> | 3119      | major histocompatibility complex, class II, DQ beta 1                     | 4.50e-01          | 4.23e-03           |

**Table S1.** Univariate associations between genes and overall survival measured by score test p-value, continued.

| Gene Symbol     | Entrez ID | Gene Description                                                                | Discovery p-value | Validation p-value |
|-----------------|-----------|---------------------------------------------------------------------------------|-------------------|--------------------|
| <i>HLA-DRA</i>  | 3122      | major histocompatibility complex, class II, DR alpha                            | 2.98e-01          | 4.77e-04           |
| <i>HLA-DRB4</i> | 3126      | major histocompatibility complex, class II, DR beta 4                           | 3.68e-01          | 6.07e-03           |
| <i>HLA-E</i>    | 3133      | major histocompatibility complex, class I, E                                    | 6.76e-02          | 2.10e-03           |
| <i>HLA-F</i>    | 3134      | major histocompatibility complex, class I, F                                    | 4.28e-02          | 5.21e-03           |
| <i>HLA-G</i>    | 3135      | major histocompatibility complex, class I, G                                    | 2.81e-02          | 1.93e-02           |
| <i>HSP90AA1</i> | 3320      | heat shock protein 90kDa alpha (cytosolic), class A member 1                    | 2.19e-01          | 3.16e-01           |
| <i>HSP90AB1</i> | 3326      | heat shock protein 90kDa alpha (cytosolic), class B member 1                    | 3.71e-02          | 5.24e-01           |
| <i>HSPA1L</i>   | 3305      | heat shock 70kDa protein 1-like                                                 | 3.93e-03          | 2.85e-01           |
| <i>HSPA2</i>    | 3306      | heat shock 70kDa protein 2                                                      | 4.00e-02          | 3.00e-01           |
| <i>HSPA4</i>    | 3308      | heat shock 70kDa protein 4                                                      | 4.99e-01          | 5.22e-01           |
| <i>HSPA5</i>    | 3309      | heat shock 70kDa protein 5 (glucose-regulated protein, 78kDa)                   | 1.08e-01          | 1.01e-01           |
| <i>HSPA6</i>    | 3310      | heat shock 70kDa protein 6 (HSP70B')                                            | 8.49e-01          | 9.41e-01           |
| <i>IFI30</i>    | 10437     | interferon, gamma-inducible protein 30                                          | 3.09e-01          | 3.85e-02           |
| <i>IFNG</i>     | 3458      | interferon, gamma                                                               | 1.30e-01          | 7.77e-02           |
| <i>KIR2DL2</i>  | 3803      | killer cell immunoglobulin-like receptor, two domains, long cytoplasmic tail, 2 | 7.75e-01          | 9.03e-02           |
| <i>KIR2DL3</i>  | 3804      | killer cell immunoglobulin-like receptor, two domains, long cytoplasmic tail, 3 | 7.61e-01          | 4.33e-01           |
| <i>PDIA3</i>    | 2923      | protein disulfide isomerase family A, member 3                                  | 7.30e-01          | 3.49e-01           |
| <i>PSME1</i>    | 5720      | proteasome (prosome, macropain) activator subunit 1 (PA28 alpha)                | 4.09e-01          | 4.52e-05           |

**Table S1.** Univariate associations between genes and overall survival measured by score test p-value, continued.

| Gene Symbol   | Entrez ID | Gene Description                                                     | Discovery p-value | Validation p-value |
|---------------|-----------|----------------------------------------------------------------------|-------------------|--------------------|
| <i>PSME2</i>  | 5721      | proteasome (prosome, macropain) activator subunit 2 (PA28 beta)      | 1.43e-01          | 3.21e-06           |
| <i>PSME3</i>  | 10197     | proteasome (prosome, macropain) activator subunit 3 (PA28 gamma; Ki) | 1.25e-01          | 5.69e-01           |
| <i>RFX5</i>   | 5993      | regulatory factor X, 5 (influences HLA class II expression)          | 9.32e-01          | 8.72e-01           |
| <i>RFXANK</i> | 8625      | regulatory factor X-associated ankyrin-containing protein            | 6.27e-01          | 5.13e-01           |
| <i>RFXAP</i>  | 5994      | regulatory factor X-associated protein                               | 5.32e-01          | 4.42e-02           |
| <i>TAP1</i>   | 6890      | transporter 1, ATP-binding cassette, subfamily B (MDR/TAP)           | 2.38e-02          | 9.79e-04           |
| <i>TAP2</i>   | 6891      | transporter 2, ATP-binding cassette, subfamily B (MDR/TAP)           | 2.46e-02          | 1.80e-01           |
| <i>TAPBP</i>  | 6892      | TAP binding protein (tapasin)                                        | 1.27e-01          | 6.83e-02           |
| <i>TNF</i>    | 7124      | tumor necrosis factor                                                | 1.26e-01          | 9.63e-01           |
| <i>CD3E</i>   | 916       | CD3e molecule, epsilon (CD3-TCR complex)                             | 1.32e-02          | 4.16e-01           |
| <i>CD3G</i>   | 917       | CD3g molecule, gamma (CD3-TCR complex)                               | 5.63e-04          | 2.92e-01           |
| <i>CD3D</i>   | 915       | CD3d molecule, delta (CD3-TCR complex)                               | 8.71e-03          | 1.21e-02           |
| <i>CD247</i>  | 919       | CD247 molecule                                                       | 2.96e-02          | 1.14e-01           |
| <i>PDCD1</i>  | 5133      | programmed cell death 1                                              | 1.64e-01          | 1.33e-01           |
| <i>CTLA4</i>  | 1493      | cytotoxic T-lymphocyte-associated protein 4                          | 9.47e-02          | 2.40e-03           |
| <i>PTPRC</i>  | 5788      | protein tyrosine phosphatase, receptor type, C                       | 3.01e-01          | 7.66e-02           |
| <i>CD28</i>   | 940       | CD28 molecule                                                        | 9.70e-01          | 1.66e-01           |
| <i>ICOS</i>   | 29851     | inducible T-cell co-stimulator                                       | 1.62e-02          | 9.49e-02           |
| <i>CD40LG</i> | 959       | CD40 ligand                                                          | 5.51e-02          | 1.83e-01           |
