# Supplementary material for: Differential Antigen Expression Profile Predicts Immunoreactive Subset of Advanced Ovarian Cancers
Source: PubMed Central journal article supplement (PMC4224408; doi:10.1371/journal.pone.0111586), 2014-11-07
Supplement: pone.0111586.s002.pdf [file pone.0111586.s002.pdf]

**Table S2.** Tissue specific quantiles of expression of lymphocyte specific markers. Low quantiles imply relatively low or no expression.

| Gene   | Quantiles |           | p        | Comments      |
|--------|-----------|-----------|----------|---------------|
|        | Tumor     | Cell Line |          |               |
| IL12B  | 0.50      | 0.021     | 0.0e+00  |               |
| FCGR1A | 0.50      | 0.051     | 6.8e-232 | (CD64)        |
| CD1D   | 0.49      | 0.055     | 3.0e-56  |               |
| IL12A  | 0.48      | 0.093     | 1.2e-255 |               |
| CLEC4A | 0.49      | 0.148     | 1.9e-210 | (CD303)       |
| IFNB1  | 0.49      | 0.152     | 2.8e-199 |               |
| FCGR3B | 0.51      | 0.153     | 1.7e-214 | (CD16b)       |
| CD14   | 0.53      | 0.204     | 6.8e-104 |               |
| IFNG   | 0.48      | 0.205     | 2.8e-155 |               |
| IL6    | 0.47      | 0.231     | 6.5e-16  |               |
| EMR1   | 0.49      | 0.312     | 1.1e-21  |               |
| ITGAM  | 0.51      | 0.317     | 3.6e-71  | (CD11b)       |
| CD19   | 0.48      | 0.318     | 8.1e-57  |               |
| FOXP3  | 0.50      | 0.329     | 3.0e-46  |               |
| PTPRC  | 0.52      | 0.350     | 1.8e-11  | (CD45)        |
| ITGAX  | 0.50      | 0.377     | 2.8e-25  |               |
| TNF    | 0.48      | 0.390     | 5.4e-11  |               |
| CD33   | 0.50      | 0.426     | 9.6e-07  |               |
| CD8A   | 0.50      | 0.472     | 3.2e-02  |               |
| NCAM1  | 0.48      | 0.476     | 8.7e-01  | (CD56) n/s    |
| THBD   | 0.48      | 0.488     | 7.8e-01  | (CD141) n/s   |
| IL2RA  | 0.50      | 0.499     | 9.5e-01  | n/s           |
| CD4    | 0.51      | 0.607     | 5.0e-16  | overexpressed |
| ITGAE  | 0.50      | 0.918     | 5.7e-173 | overexpressed |
