# Supplementary material for: Differential Antigen Expression Profile Predicts Immunoreactive Subset of Advanced Ovarian Cancers
Source: PubMed Central journal article supplement (PMC4224408; doi:10.1371/journal.pone.0111586), 2014-11-07
Supplement: pone.0111586.s003.pdf [file pone.0111586.s003.pdf]

**Table S3.** Regression table for multivariate logistic regression model using antigen expression to predict immunoreactive class status.

|               | Estimate | Std. Error | z value | Pr(>  z )    |
|---------------|----------|------------|---------|--------------|
| (Intercept)   | -2.8086  | 0.2462     | -11.409 | < 2e-16 ***  |
| <i>CTNNA2</i> | -0.7965  | 0.3051     | -2.610  | 0.009044 **  |
| <i>ZNF165</i> | 0.6294   | 0.1646     | 3.825   | 0.000131 *** |
| <i>TMEFF1</i> | -0.6014  | 0.1899     | -3.167  | 0.001543 **  |
| <i>CEP290</i> | -0.5942  | 0.1850     | -3.212  | 0.001318 **  |
| <i>TEX15</i>  | -0.4828  | 0.1782     | -2.710  | 0.006730 **  |
| <i>MAGEA3</i> | 0.3669   | 0.1192     | 3.079   | 0.002075 **  |

Significance codes: 0 \*\*\* 0.001 \*\* 0.01 . 1
