# Supplementary material for: Differential Antigen Expression Profile Predicts Immunoreactive Subset of Advanced Ovarian Cancers
Source: PubMed Central journal article supplement (PMC4224408; doi:10.1371/journal.pone.0111586), 2014-11-07
Supplement: pone.0111586.s004.pdf [file pone.0111586.s004.pdf]

**Table S4.** List of identified cancer testis (CT) antigens.

| Antigen        | Location      | CT.identifier | Class      | Entrez ID | Gene Description                                                       |
|----------------|---------------|---------------|------------|-----------|------------------------------------------------------------------------|
| <i>SPO11</i>   | 20q13.2-q13.3 | CT35          | Not IR     | 23626     | SPO11 meiotic protein covalently bound to DSB homolog                  |
| <i>CEP290</i>  | 12q21.32      | CT87          | Not IR     | 80184     | Centrosomal protein 290kDa                                             |
| <i>AKAP3</i>   | 12p13.3       | CT82          | Not IR     | 10566     | A kinase (PRKA) anchor protein 3                                       |
| <i>TMEFF1</i>  | 9q31          | CT 120.1      | Not IR     | 8577      | transmembrane protein with EGF-like and two follistatin-like domains 1 |
| <i>CTNNA2</i>  | 2p12-p11.1    | CT 114        | Not IR     | 1496      | catenin (cadherin-associated protein), alpha 2                         |
| <i>TEX15</i>   | 8p12          | CT42          | Not IR     | 56154     | testis expressed 15                                                    |
| <i>ADAM2</i>   | 8p11.2        | CT15          | Not IR     | 2515      | ADAM metallopeptidase domain 2                                         |
| <i>ZNF165</i>  | 6p21.3        | CT53          | IR         | 7718      | zinc finger protein 165                                                |
| <i>CEP55</i>   | 10q23.33      | CT 111        | IR         | 55165     | centrosomal protein 55kDa                                              |
| <i>ATAD2</i>   | 8q24.13       | CT137         | IR         | 29028     | ATPase family, AAA domain containing 2                                 |
| <i>MAGEA3</i>  | Xq28          | CT1.3         | IR         | 4102      | melanoma antigen family A, 3                                           |
| <i>CTAGE5</i>  | 14q13.3       | CT21.3        | IR         | 4253      | CTAGE family, member 5                                                 |
| <i>TTK</i>     | 6q13-q21      | CT96          | Co-stim IR | 7272      | TTK protein kinase                                                     |
| <i>PBK</i>     | 8p21.2        | CT84          | Co-stim IR | 55872     | PDZ binding kinase                                                     |
| <i>PRAME</i>   | 22q11.22      | CT130         | Co-stim IR | 23532     | preferentially expressed antigen in melanoma                           |
| <i>CXorf48</i> | Xq26.3        | CT55          | Co-stim IR | 54967     | chromosome X open reading frame 48                                     |

All CT Antigens used in this study:

*ACTL8, ADAM2, ADAM29, AKAP3, AKAP4, ATAD2, BAGE, BRDT, CABYR, CASC5, CCDC33, CCNA1, CEP290, CEP55, CRISP2, CTAG2, CTAGE1, CTAGE5, CTNNA2, CXorf48, DDX43, DKKL1, DMRT1, ELOVL4, GAGE1, GAGE3, GPATCH2, IL13RA2, KIAA0100, LAGE3, LDHC, LUZP4, MAGEA1, MAGEA10, MAGEA11, MAGEA12, MAGEA3, MAGEA4, MAGEA5, MAGEA6, MAGEA8, MAGEB1, MAGEB2, MAGEB3, MAGEB4, MAGEC1, MAGEC2, MAGEC3, MAGED1, MAGED2, MAGEF1, MAGEH1, MORC1, NOL4, NR6A1, NXF2, ODF1, ODF2, OIP5, PAGE1, PAGE4, PBK, PIWIL2, PLAC1, PRAME, PRM1, PRM2, RQCD1, SAGE1, SEMG1, SPA17, SPAG1, SPAG4, SPAG6, SPAG8, SPAG9, SPANXC, SPINLW1, SPO11, SSX1, SSX2, SSX3, SSX5, SYCP1, TAF7L, TDRD1, TEX14, TEX15, TFDP3, THEG, TMEFF1, TPTE, TSGA10, TSP50, TTK, TULP2, VENTXP1, ZNF165.*
